# Supplementary material for: Relationship Between Nerve Fiber Layer Hemorrhages and Outcomes in Central Retinal Vein Occlusion
Source: PubMed Central journal article supplement — Invest Ophthalmol Vis Sci. 2020 May 27;61(5):54. doi: 10.1167/iovs.61.5.54 (PMC7405700; doi:10.1167/iovs.61.5.54), 2020-05-27
Supplement: iovs-61-5-54_s001.pdf [file iovs-61-5-54_s001.pdf]

Supplemental Table 1: Contribution of eyes from each center

| Center                                                                                                                                                         | # of eyes |
|----------------------------------------------------------------------------------------------------------------------------------------------------------------|-----------|
| Stein Eye Institute, University of California, Los Angeles, CA, USA                                                                                            | 24        |
| Cole Eye Institute, Cleveland Clinic Foundation, Cleveland, OH, USA                                                                                            | 21        |
| Westmead and Central Clinical Schools, University of Sydney; Faculty of Medicine and Health Sciences, Macquarie University, Sydney, New South Wales, Australia | 13        |
| New York Eye and Ear Infirmary of Mount Sinai, New York, New York, USA                                                                                         | 9         |
| Vitreous Retina Macula Consultants of New York, NY, USA                                                                                                        | 7         |
| Ankara Ulucanlar Eye Training and Research Hospital, Ankara, Turkey                                                                                            | 6         |
| Tel Aviv Sourasky Medical Center, Sackler Faculty of Medicine, Tel Aviv University, Tel Aviv, Israel                                                           | 5         |
| Retina Center, Nune Eye Hospital, Seoul, Republic of Korea                                                                                                     | 5         |
| Eye Clinic, University of Cagliari, Cagliari, Italy                                                                                                            | 4         |
| St. Franziskus-Hospital, Münster, Germany                                                                                                                      | 4         |
| Ospedale San Raffaele Scientific Institute University Vita-Salute San Raffaele, Milan, Italy                                                                   | 4         |
| Vitreous Retina Macula Specialists of Toronto, Toronto, Ontario, Canada                                                                                        | 2         |
| Université Paris-Diderot, Sorbonne Paris Cité. France                                                                                                          | 2         |
| Faculty of Medicine Siriraj Hospital, Mahidol University, Bangkok, Thailand                                                                                    | 2         |
